# Supplementary material
Source: ML conference proceedings conference paper supplement (https://proceedings.neurips.cc/paper_files/paper/2010/hash/6cfe0e6127fa25df2a0ef2ae1067d915-Abstract.html)
Supplement: Supplementary file [file 6cfe0e6127fa25df2a0ef2ae1067d915-Supplemental.zip]

---

# Improvements to the Sequence Memoizer

## Supplementary Material

---

**Jan Gasthaus**  
 Gatsby Computational Neuroscience Unit  
 University College London  
 London, WC1N 3AR, UK  
 j.gasthaus@gatsby.ucl.ac.uk

**Yee Whye Teh**  
 Gatsby Computational Neuroscience Unit  
 University College London  
 London, WC1N 3AR, UK  
 ywtehd@gatsby.ucl.ac.uk

### 1 Generalized Stirling Numbers of Type $(-1, -d, 0)$

In Appendix A.5 of [1] it was shown by induction that

$$\sum_{A \in \mathcal{A}_{ct}} \prod_{a \in A} [1 - d]_1^{|a|-1} = S_d(c, t) \quad (1)$$

where  $S_d(c, t)$  is a generalized Stirling number of type  $(-1, -d, 0)$  [2]. These can be computed recursively as follows:

$$S_d(1, 1) = S_d(0, 0) = 1 \quad (2)$$

$$S_d(c, 0) = S_d(0, t) = 0 \quad \text{for } c, t > 0 \quad (3)$$

$$S_d(c, t) = 0 \quad \text{for } t > c \quad (4)$$

$$S_d(c, t) = S_d(c-1, t-1) + (c-1-dt)S_d(c-1, t) \quad \text{for } 0 < t \leq c \quad (5)$$

### 2 More Verbose Proof of Theorem 1

**Theorem 1.** Suppose  $A_2 \in \mathcal{A}_c$ ,  $A_1 \in \mathcal{A}_{|A_2|}$ ,  $C \in \mathcal{A}_c$  and  $F_a \in \mathcal{A}_{|a|}$  for each  $a \in C$  are related as above. Then the following describe equivalent distributions:

(I)  $A_2 \sim \text{CRP}_c(\alpha d_2, d_2)$  and  $A_1|A_2 \sim \text{CRP}_{|A_2|}(\alpha, d_1)$ .

(II)  $C \sim \text{CRP}_c(\alpha d_2, d_1 d_2)$  and  $F_a|C \sim \text{CRP}_{|a|}(-d_1 d_2, d_2)$  for each  $a \in C$ .

*Proof.* In the proof we will use the identity  $[\beta\delta + \delta]_\delta^{n-1} = \delta^{n-1}[\beta + 1]_1^{n-1}$  (for all  $\beta, \delta, n$ ) several times; let us call it Identity 1.

To complete the proof, we simply show that the joint distributions are the same. Starting with the definition of the the CRP distribution

$$P(A) = \frac{[\alpha + d]_d^{|A|-1}}{[\alpha + 1]_1^{c-1}} \prod_{a \in A} [1 - d]_1^{|a|-1} \quad \text{for each } A \in \mathcal{A}_c, \quad (6)$$

we have the following by multiplying the two distributions together:

$$P(A_1, A_2) = \left( \frac{[\alpha + d_1]_{d_1}^{|A_1|-1}}{[\alpha + 1]_1^{|A_2|-1}} \prod_{a \in A_1} [1 - d_1]_1^{|a|-1} \right) \left( \frac{[\alpha d_2 + d_2]_{d_2}^{|A_2|-1}}{[\alpha d_2 + 1]_1^{c-1}} \prod_{b \in A_2} [1 - d_2]_1^{|b|-1} \right) \quad (7)$$

Re-arranging terms yields:

$$= \frac{[\alpha + d_1]_{d_1}^{|A_1|-1}}{[\alpha + 1]_1^{|A_2|-1}} \frac{[\alpha d_2 + d_2]_{d_2}^{|A_2|-1}}{[\alpha d_2 + 1]_1^{c-1}} \left( \prod_{a \in A_1} [1 - d_1]_1^{|a|-1} \right) \left( \prod_{b \in A_2} [1 - d_2]_1^{|b|-1} \right) \quad (8)$$

Using Identity 1 on  $[\alpha d_2 + d_2]_{d_2}^{|A_2|-1}$  yields

$$= \frac{[\alpha + d_1]_{d_1}^{|A_1|-1}}{[\alpha + 1]_1^{|A_2|-1}} \frac{d_2^{|A_2|-1} [\alpha + 1]_1^{|A_2|-1}}{[\alpha d_2 + 1]_1^{c-1}} \left( \prod_{a \in A_1} [1 - d_1]_1^{|a|-1} \right) \left( \prod_{b \in A_2} [1 - d_2]_1^{|b|-1} \right) \quad (9)$$

Cancelling one of the resulting terms we get:

$$= \frac{[\alpha + d_1]_{d_1}^{|A_1|-1}}{[\alpha d_2 + 1]_1^{c-1}} \frac{d_2^{|A_2|-1}}{[\alpha d_2 + 1]_1^{c-1}} \left( \prod_{a \in A_1} [1 - d_1]_1^{|a|-1} \right) \left( \prod_{b \in A_2} [1 - d_2]_1^{|b|-1} \right) \quad (10)$$

Multiplying and dividing by  $d_2^{|a|-1}$  within the first product and using Identity 1 again we get:

$$= \frac{[\alpha + d_1]_{d_1}^{|A_1|-1}}{[\alpha d_2 + 1]_1^{c-1}} \frac{d_2^{|A_2|-1}}{[\alpha d_2 + 1]_1^{c-1}} \left( \prod_{a \in A_1} \frac{1}{d_2^{|a|-1}} [d_2 - d_1 d_2]_{d_2}^{|a|-1} \right) \left( \prod_{b \in A_2} [1 - d_2]_1^{|b|-1} \right) \quad (11)$$

Using  $\sum_{a \in A_1} |a| = |A_2|$  to take the  $1/(d_2^{|a|-1})$  term out of the first product:

$$= \frac{[\alpha + d_1]_{d_1}^{|A_1|-1}}{[\alpha d_2 + 1]_1^{c-1}} \frac{d_2^{|A_2|-1}}{[\alpha d_2 + 1]_1^{c-1}} \frac{1}{d_2^{|A_2|-|A_1|}} \left( \prod_{a \in A_1} [d_2 - d_1 d_2]_{d_2}^{|a|-1} \right) \left( \prod_{b \in A_2} [1 - d_2]_1^{|b|-1} \right) \quad (12)$$

Using  $d_2^{|A_2|-|A_1|} = d_2^{|A_2|-1} d_2^{-|A_1|+1}$  and cancelling the  $d_2^{|A_2|-1}$  term:

$$= \frac{[\alpha + d_1]_{d_1}^{|A_1|-1}}{[\alpha d_2 + 1]_1^{c-1}} \frac{1}{d_2^{-|A_1|+1}} \left( \prod_{a \in A_1} [d_2 - d_1 d_2]_{d_2}^{|a|-1} \right) \left( \prod_{b \in A_2} [1 - d_2]_1^{|b|-1} \right) \quad (13)$$

Multiplying and dividing by  $d_2^{|A_1|-1}$  and using Identity 1 a third time we get:

$$= \frac{[\alpha d_2 + d_1 d_2]_{d_1 d_2}^{|A_1|-1}}{d_2^{|A_1|-1}} \frac{1}{[\alpha d_2 + 1]_1^{c-1} d_2^{-|A_1|+1}} \left( \prod_{a \in A_1} [d_2 - d_1 d_2]_{d_2}^{|a|-1} \right) \left( \prod_{b \in A_2} [1 - d_2]_1^{|b|-1} \right) \quad (14)$$

Finally, cancelling terms again we get:

$$= \frac{[\alpha d_2 + d_1 d_2]_{d_1 d_2}^{|A_1|-1}}{[\alpha d_2 + 1]_1^{c-1}} \left( \prod_{a \in A_1} [d_2 - d_1 d_2]_{d_2}^{|a|-1} \right) \left( \prod_{b \in A_2} [1 - d_2]_1^{|b|-1} \right) \quad (15)$$

Re-grouping the products and expressing the same quantities in terms of  $C$  and  $\{F_a\}$ ,

$$= \frac{[\alpha d_2 + d_1 d_2]_{d_1 d_2}^{|C|-1}}{[\alpha d_2 + 1]_1^{c-1}} \prod_{a \in C} \left( [d_2 - d_1 d_2]_{d_2}^{F_a-1} \prod_{b \in F_a} [1 - d_2]_1^{|b|-1} \right) = P(C, \{F_a\}_{a \in C}) \quad (16)$$

By comparison with (6), we see that conditioning on  $C$  each  $F_a \sim \text{CRP}_{|a|}(-d_1 d_2, d_2)$ .

Marginalizing  $\{F_a\}$  out using the normalization constant from (6) we have:

$$P(C) = \frac{[\alpha d_2 + d_1 d_2]_{d_1 d_2}^{|C|-1}}{[\alpha d_2 + 1]_1^{c-1}} \prod_{a \in C} [1 - d_1 d_2]_1^{|a|-1} \quad (17)$$

So  $C \sim \text{CRP}_c(\alpha d_2, d_1 d_2)$  and  $(I) \Rightarrow (II)$ . Reversing the same argument shows that  $(II) \Rightarrow (I)$ .  $\square$

## References

- [1] Y. W. Teh. A Bayesian interpretation of interpolated Kneser-Ney. Technical Report TRA2/06, School of Computing, National University of Singapore, 2006.
- [2] L. C. Hsu and P. J.-S. Shiue. A unified approach to generalized Stirling numbers. *Advances in Applied Mathematics*, 20:366–384, 1998.
